# Supplementary material
Source: PubMed Central journal article supplement (PMC10408488)
Supplement: ajcr0013-2886-f9.pdf [file ajcr0013-2886-f9.pdf]

## The role of LRP1B in the LUAD

**Supplementary Table 1.** Differentially regulated genes in RNA-seq

| shLRP1B-1 | shLRP1B-2 | shLRP1B-3 | shNC-1   | shNC-2   | shNC-3   | shLRP1B  |
|-----------|-----------|-----------|----------|----------|----------|----------|
| 2.881786  | 0         | 0         | 6.334299 | 8.204781 | 2.958071 | 0.960595 |
| 203.6462  | 352.7641  | 159.5777  | 3287.501 | 4332.124 | 2468.017 | 238.6627 |
| 320.8389  | 128.8184  | 450.1994  | 11.7637  | 20.51195 | 19.72047 | 299.9522 |
| 1415.918  | 830.383   | 1057.863  | 219.8907 | 188.71   | 242.5618 | 1101.388 |
| 4.802977  | 12.88184  | 6.340837  | 110.3978 | 130.2509 | 114.3787 | 8.00855  |
| 350.6173  | 219.9821  | 98.28297  | 9.953899 | 24.61434 | 11.83228 | 222.9608 |
| 268.9667  | 228.9003  | 412.1544  | 41.62539 | 33.84472 | 54.2313  | 303.3405 |
| 70.12347  | 90.17285  | 46.49947  | 374.6285 | 592.7954 | 347.0803 | 68.93193 |

**Supplementary Table 2.** The relative levels of JAK-STAT3 signaling pathway-related molecules in A549 cells with knockdown of LRP1B versus control cells (n = 3)

| shNC-3   | shLRP1B  | shNC     | log2FoldCh | p value  | padj     | gene_name |
|----------|----------|----------|------------|----------|----------|-----------|
| 2.958071 | 0.960595 | 5.832384 | -2.577934  | 0.138215 | 1        | LRP1B     |
| 7.88819  | 78.39484 | 7.415519 | 3.421497   | 7.99E-07 | 0.000287 | IL6       |
| 52.25926 | 208.9918 | 45.49232 | 2.199126   | 1.80E-07 | 8.28E-05 | IFNL1     |
| 195.2327 | 777.8646 | 142.0965 | 2.453392   | 7.72E-10 | 9.81E-07 | IL11      |
| 5.916142 | 17.66553 | 5.04884  | 1.821249   | 0.066796 | 0.555054 | IL7R      |
| 623.167  | 1462.691 | 519.2951 | 1.493837   | 1.93E-05 | 0.003668 | SOCS3     |
| 169.5961 | 259.7961 | 135.1594 | 0.9427     | 0.007996 | 0.192901 | STAT5A    |
| 713.8812 | 719.9657 | 603.1456 | 0.255364   | 0.406481 | 0.837585 | ACSF3     |

**Supplementary Table 3.** Gene and primer sequence

| Target | Primer Name   | Sequence (5'-3')         |
|--------|---------------|--------------------------|
| LRP1B  | LRP1B-human-F | TGCCATTGAAGTGGTTGTGG     |
|        | LRP1B-human-R | AGCCATCTAGTTTGCCACT      |
| IL6    | IL6-human-F   | ACTCACCTCTTCAGAACGAATTG  |
|        | IL6-human-R   | CCATCTTTGGAAGGTTTCAGGTTG |
| JAK1   | JAK1-human-F  | GTTTGCCCTGTATGACGAGAAC   |
|        | JAK1-human-R  | ACCTCATCCGGTAGTGGAGC     |
| JAK2   | JAK2-human-F  | TCGGSATCGAACTGGACTA      |
|        | JAK2-human-R  | ATCGGATTGCTGAATGCAA      |
| STAT3  | STAT3-human-F | ACCAGCAGTATAGCCGCTTC     |
|        | STAT3-human-R | GCCACAATCCGGGCAATCT      |
| GAPDH  | GAPDH-human-F | CGCTGAGTACGTCGTGGAGTC    |
|        | GAPDH-human-R | GCTGATGATCTTGAGGCTGTTGTC |

## The role of LRP1B in the LUAD

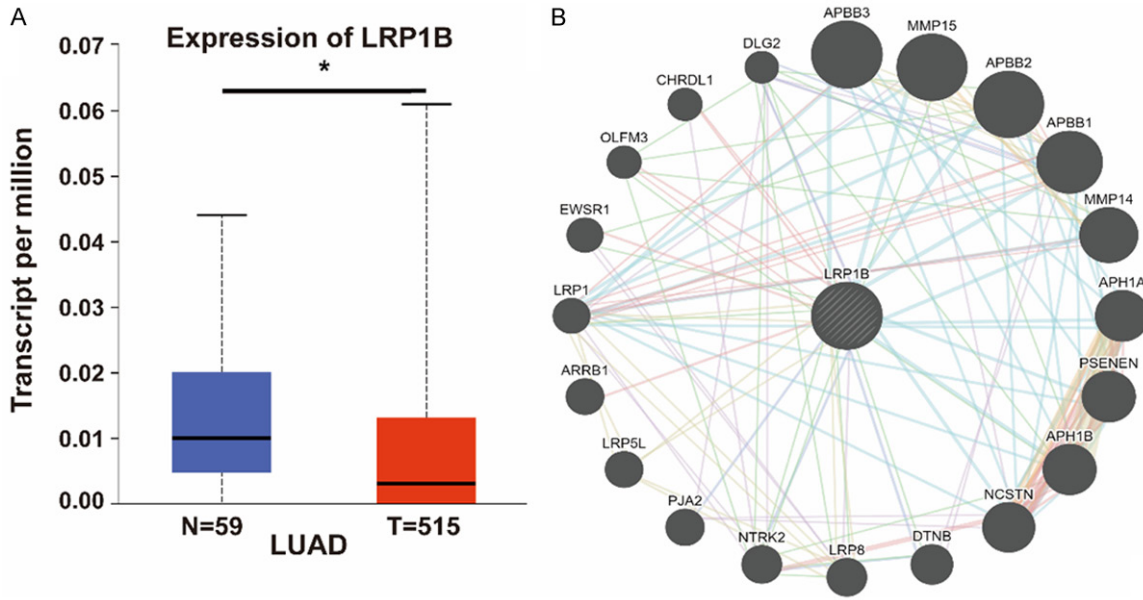

**Supplementary Figure 1.** In LUAD cohort, expression of LRP1B in normal tissues and tumor tissues and LRP1B's protein-protein interaction network. A. The expression status of the LRP1B gene in normal or tumor was analyzed through GEPIA2 (\*P < 0.05). B. The interaction of LRP1B related proteins in LUAD in GeneMANIA portal.

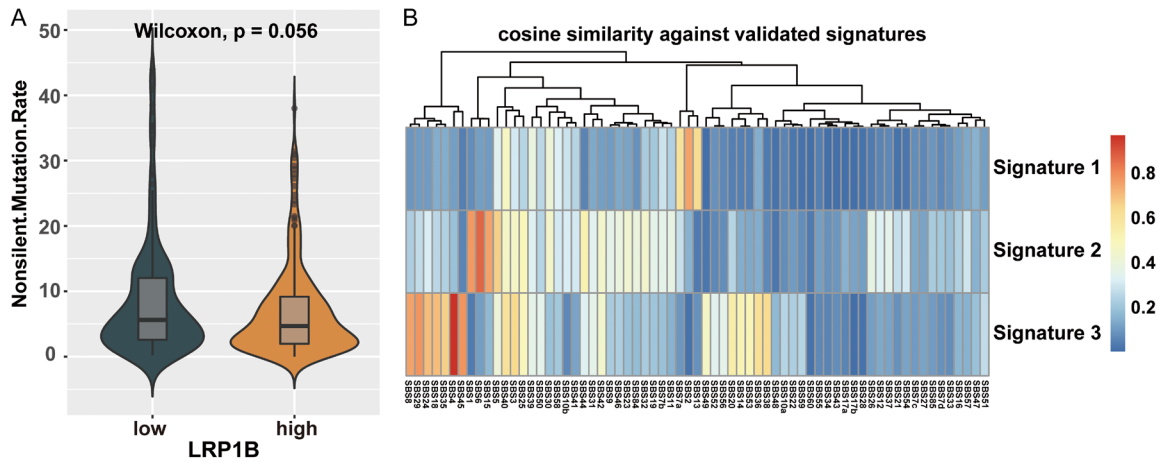

**Supplementary Figure 2.** Comparison of nonsilent mutation rate and extraction of mutation signatures. A. Comparison of nonsilent mutation rate between LRP1B low-expression group with LRP1B high-expression group in TCGA. B. Cosine similarity analysis of extracted mutational signatures against the 67 identified signatures in COSMIC (Version 3) with heatmap illustration.



## The role of LRP1B in the LUAD

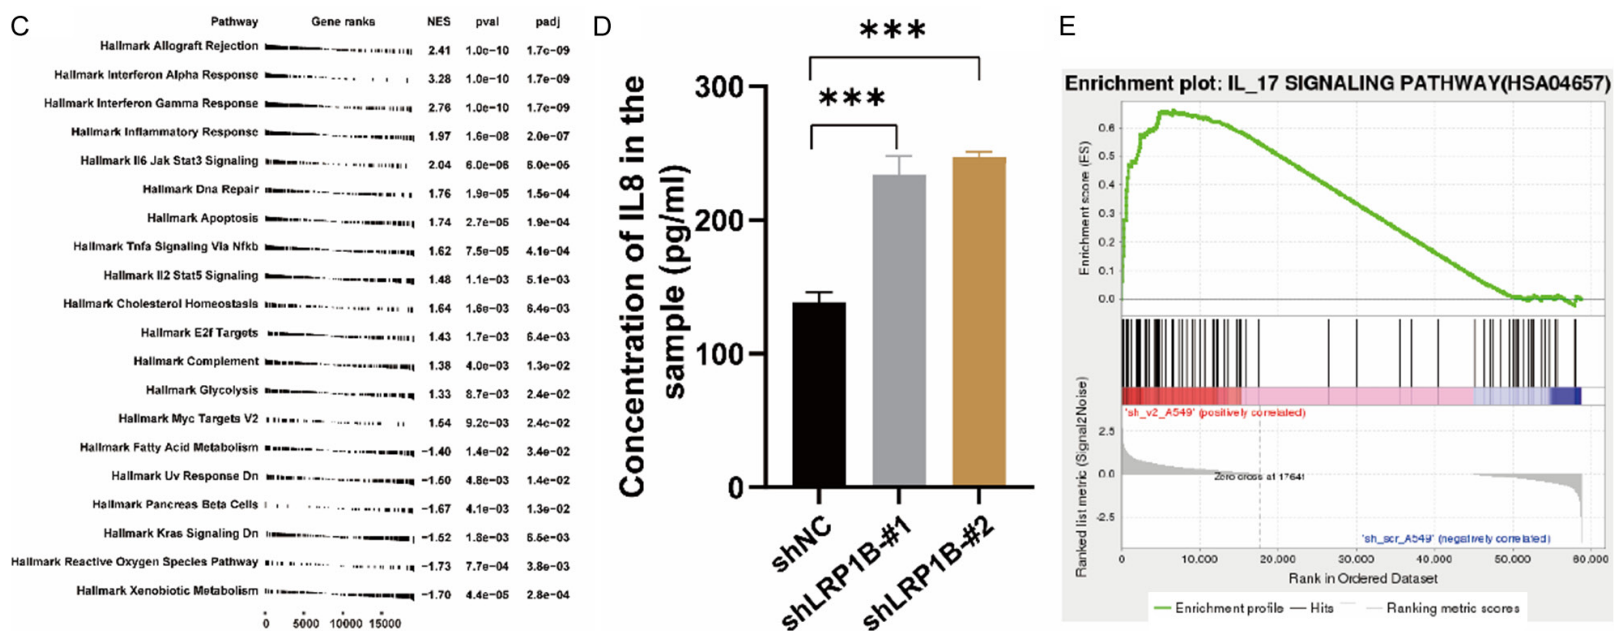

**Supplementary Figure 3.** Low expression of LRP1B significantly elevates the activity of the IL6-JAK-STAT3, IL17 signaling pathway et al inflammation signaling. A, B. GO enrichment analysis of differentially expressed genes, the left side represents up-regulated expression, and the right side is to be down-regulated expression. BP, CC, and MF represent biological pathways, cellular components, and molecular functions obtained by GO analysis, respectively. C. Data Display about KEGG pathway enrichment analyses of differentially expressed genes in Control and Knock down LRP1B of A549. D. A549 cells with knockdown of LRP1B and control cells were seeded for 12 hours before medium replacement. Culture supernatants were collected 48 hours after medium replacement and the IL-8 levels were detected by ELISA ( $***P < 0.001$ ). E. GSEA of IL17 signaling pathway to assess specific enrichment of A549 cells with knockdown of LRP1B versus control cells.
